# Supplementary material for: SARS-CoV-2 Omicron is an immune escape variant with an altered cell entry pathway
Source: PubMed Central journal article supplement (PMC9352574; doi:10.1038/s41564-022-01143-7), 2022-07-07
Supplement: 41564_2022_1143_MOESM1_ESM.pdf [file 41564_2022_1143_MOESM1_ESM.pdf]

---

**Supplementary information**

---

**SARS-CoV-2 Omicron is an immune escape variant with an altered cell entry pathway**

---

In the format provided by the authors and unedited

## **SARS-CoV-2 Omicron is an immune escape variant with an altered cell entry pathway**

Brian J. Willett, Joe Grove, Oscar A. MacLean, Craig Wilkie, Giuditta De Lorenzo, Wilhelm Furnon, Diego Cantoni, Sam Scott, Nicola Logan, Shirin Ashraf, Maria Manali, Agnieszka Szemiel, Vanessa Cowton, Elen Vink, William T. Harvey, Chris Davis, Patawee Asamaphan, Katherine Smollett, Lily Tong, Richard Orton, Joseph Hughes, Poppy Holland, Vanessa Silva, David J. Pascall, Kathryn Puxty, Ana da Silva Filipe, Gonzalo Yebra, Sharif Shaaban, Matthew T. G. Holden, Rute Maria Pinto, Rory Gunson, Kate Templeton, Pablo R. Murcia, Arvind H. Patel, Paul Klenerman, Susanna Dunachie, PITCH Consortium\*, The COVID-19 Genomics UK (COG-UK) Consortium\*, John Haughney, David L. Robertson, Massimo Palmarini, Surajit Ray & Emma C. Thomson

Supplementary Tables 1 to 9

**Supplementary Table 1. Comparison of SARS-CoV-2 antibody responses elicited by two doses of SARS-CoV-2 vaccine.** Data were analyzed in GraphPad Prism v8.4.3, groups were compared by ordinary one-way ANOVA.

| Tukey's multiple comparisons test | Mean Diff. | 95.00% CI of diff. | Significant? | Summary | Adjusted P Value |
|-----------------------------------|------------|--------------------|--------------|---------|------------------|
| Spike BNT162b2 vs. ChAdOx1        | 2588       | -278.1 to 5453     | No           | ns      | 0.1212           |
| Spike BNT162b2 vs. mRNA-1273      | -248.4     | -3114 to 2617      | No           | ns      | >0.9999          |
| Spike ChAdOx1 vs. mRNA-1273       | -2836      | -5702 to 29.73     | No           | ns      | 0.0553           |
| RBD BNT162b2 vs. ChAdOx1          | 4649       | 1783 to 7514       | Yes          | ****    | <0.0001          |
| RBD BNT162b2 vs. mRNA-1273        | -449.1     | -3315 to 2417      | No           | ns      | >0.9999          |
| RBD ChAdOx1 vs. mRNA-1273         | -5098      | -7964 to -2232     | Yes          | ****    | <0.0001          |
| NTD BNT162b2 vs. ChAdOx1          | 5755       | 2889 to 8620       | Yes          | ****    | <0.0001          |
| NTD BNT162b2 vs. mRNA-1273        | 714.7      | -2151 to 3581      | No           | ns      | 0.9996           |
| NTD ChAdOx1 vs. mRNA-1273         | -5040      | -7906 to -2174     | Yes          | ****    | <0.0001          |
| N BNT162b2vs. ChAdOx1             | 2.183      | -2864 to 2868      | No           | ns      | >0.9999          |
| N BNT162b2 vs. mRNA-1273          | 0.4        | -2865 to 2866      | No           | ns      | >0.9999          |
| N ChAdOx1 vs. mRNA-1273           | -1.783     | -2868 to 2864      | No           | ns      | >0.9999          |

**Supplementary Table 2. Comparison of HCoV antibody responses elicited by two doses of SARS-CoV-2 vaccine.** Data were analyzed in GraphPad Prism v8.4.3, groups were compared by ordinary one-way ANOVA.

| Tukey's multiple comparisons test | Mean Diff. | 95.00% CI of diff. | Significant? | Summary     | Adjusted P Value  |
|-----------------------------------|------------|--------------------|--------------|-------------|-------------------|
| 229E BNT162b2 vs. ChAdOx1         | 3296       | -19673 to 26265    | No           | ns          | >0.9999           |
| 229E BNT162b2 vs. mRNA-1273       | 5282       | -17687 to 28251    | No           | ns          | 0.9998            |
| 229E ChAdOx1 vs. mRNA-1273        | 1986       | -20982 to 24955    | No           | ns          | >0.9999           |
| OC43 BNT162b2 vs. ChAdOx1         | 39581      | 16612 to 62550     | <b>Yes</b>   | <b>****</b> | <b>&lt;0.0001</b> |
| OC43 BNT162b2 vs. mRNA-1273       | 18396      | -4573 to 41365     | No           | ns          | 0.2628            |
| OC43 ChAdOx1 vs. mRNA-1273        | -21185     | -44154 to 1784     | No           | ns          | 0.1027            |
| NL63 BNT162b2 vs. ChAdOx1         | 1317       | -21652 to 24286    | No           | ns          | >0.9999           |
| NL63 BNT162b2 vs. mRNA-1273       | 696.9      | -22272 to 23666    | No           | ns          | >0.9999           |
| NL63 ChAdOx1 vs. mRNA-1273        | -620       | -23589 to 22349    | No           | ns          | >0.9999           |
| HKU1 BNT162b2vs. ChAdOx1          | 17914      | -5055 to 40883     | No           | ns          | 0.3015            |
| HKU1 BNT162b2 vs. mRNA-1273       | 5468       | -17501 to 28437    | No           | ns          | 0.9998            |
| HKU1 ChAdOx1 vs. mRNA-1273        | -12446     | -35415 to 10523    | No           | ns          | 0.8243            |

**Supplementary Table 3. Comparison of influenza antibody responses elicited by two doses of SARS-CoV-2 vaccine.** Data were analyzed in GraphPad Prism v8.4.3, groups were compared by ordinary one-way ANOVA.

| Tukey's multiple comparisons test         | Mean Diff. | 95.00% CI of diff. | Significant? | Summary | Adjusted P Value |
|-------------------------------------------|------------|--------------------|--------------|---------|------------------|
| Flu A Michigan H1 BNT162b2 vs. ChAdOx1    | 42355      | -49090 to 133800   | No           | ns      | 0.9615           |
| Flu A Michigan H1 BNT162b2 vs. mRNA-1273  | 34380      | -57065 to 125825   | No           | ns      | 0.9943           |
| Flu A Michigan H1 ChAdOx1 vs. mRNA-1273   | -7975      | -99420 to 83469    | No           | ns      | >0.9999          |
| Flu A Hong Kong H3 BNT162b2 vs. ChAdOx1   | 22853      | -68592 to 114298   | No           | ns      | >0.9999          |
| Flu A Hong Kong H3 BNT162b2 vs. mRNA-1273 | 43959      | -47486 to 135403   | No           | ns      | 0.948            |
| Flu A Hong Kong H3 ChAdOx1 vs. mRNA-1273  | 21106      | -70339 to 112550   | No           | ns      | >0.9999          |
| Flu A Shanghai H7 BNT162b2 vs. ChAdOx1    | -3370      | -94815 to 88074    | No           | ns      | >0.9999          |
| Flu A Shanghai H7 BNT162b2 vs. mRNA-1273  | -5570      | -97015 to 85874    | No           | ns      | >0.9999          |
| Flu A Shanghai H7 ChAdOx1 vs. mRNA-1273   | -2200      | -93645 to 89244    | No           | ns      | >0.9999          |
| Flu B Phuket HA BNT162b2 vs. ChAdOx1      | 54701      | -36744 to 146145   | No           | ns      | 0.7707           |
| Flu B Phuket HA BNT162b2 vs. mRNA-1273    | 83834      | -7611 to 175279    | No           | ns      | 0.1132           |
| Flu B Phuket HA ChAdOx1 vs. mRNA-1273     | 29133      | -62311 to 120578   | No           | ns      | 0.999            |
| Flu B Brisbane BNT162b2 vs. ChAdOx1       | 35122      | -56323 to 126566   | No           | ns      | 0.993            |
| Flu B Brisbane BNT162b2 vs. mRNA-1273     | 64342      | -27102 to 155787   | No           | ns      | 0.5138           |
| Flu B Brisbane ChAdOx1 vs. mRNA-1273      | 29220      | -62224 to 120665   | No           | ns      | 0.999            |

**Supplementary Table 4. Comparison of neutralising antibody titres elicited by two doses of SARS-CoV-2 vaccine.** Neutralising antibody responses were quantified against Wuhan or Omicron spike glycoprotein-bearing HIV(SARS-CoV-2) pseudotypes. Data were analyzed in GraphPad Prism v8.4.3, groups were compared by ordinary one-way ANOVA.

| Tukey's multiple comparisons test | Mean 1 | Mean 2 | Mean Diff. | 95.00% CI of diff. | Significant? | Summary | Adjusted P Value |
|-----------------------------------|--------|--------|------------|--------------------|--------------|---------|------------------|
| B.1 BNT162b2 vs. ChAdOx1          | 4978   | 882.3  | 4096       | 733.8 to 7458      | Yes          | **      | 0.0075           |
| B.1 BNT162b2 vs. mRNA-1273        | 4978   | 21118  | -16140     | -19502 to -12778   | Yes          | ****    | <0.0001          |
| B.1 ChAdOx1 vs. mRNA-1273         | 882.3  | 21118  | -20236     | -23598 to -16874   | Yes          | ****    | <0.0001          |
| BA.1 BNT162b2 vs. ChAdOx1         | 148.3  | 61.9   | 86.39      | -3276 to 3448      | No           | ns      | >0.9999          |
| BA.1 BNT162b2 vs. mRNA-1273       | 148.3  | 285    | -136.7     | -3499 to 3225      | No           | ns      | >0.9999          |
| BA.1 ChAdOx1 vs. mRNA-1273        | 61.9   | 285    | -223.1     | -3585 to 3139      | No           | ns      | >0.9999          |
| BNT162b2 B.1 vs. BA.1             | 4978   | 148.3  | 4830       | 1468 to 8192       | Yes          | ***     | 0.0008           |
| ChAdOx1 B.1 vs. BA.1              | 882.3  | 61.9   | 820.4      | -2542 to 4182      | No           | ns      | 0.981            |
| mRNA-1273 B.1 vs. BA.1            | 21118  | 285    | 20833      | 17471 to 24195     | Yes          | ****    | <0.0001          |

**Supplementary Table 5. Comparison of SARS-CoV-2 antibody responses elicited by a third dose of SARS-CoV-2 vaccine.** Data were analyzed in GraphPad Prism v8.4.3, groups were compared by ordinary one-way ANOVA. P= BNT162b2, AZ = ChAdOx1, M = mRNA-1273.

| Tukey's multiple comparisons test | Mean Diff. | 95.00% CI of diff. | Significant? | Summary | Adjusted P Value |
|-----------------------------------|------------|--------------------|--------------|---------|------------------|
| Spike AZ+P vs. AZ+M               | 1163       | -4354 to 6680      | No           | ns      | >0.9999          |
| Spike AZ+P vs. P+P                | 1007       | -3360 to 5374      | No           | ns      | >0.9999          |
| Spike AZ+P vs. P+M                | 361.3      | -8410 to 9133      | No           | ns      | >0.9999          |
| Spike AZ+M vs. P+P                | -156       | -5239 to 4927      | No           | ns      | >0.9999          |
| Spike AZ+M vs. P+M                | -801.5     | -9951 to 8348      | No           | ns      | >0.9999          |
| Spike P+P vs. P+M                 | -645.5     | -9151 to 7860      | No           | ns      | >0.9999          |
| RBD AZ+P vs. AZ+M                 | 2675       | -2842 to 8192      | No           | ns      | 0.9453           |
| RBD AZ+P vs. P+P                  | 1439       | -2928 to 5806      | No           | ns      | 0.9988           |
| RBD AZ+P vs. P+M                  | 37.5       | -8734 to 8809      | No           | ns      | >0.9999          |
| RBD AZ+M vs. P+P                  | -1236      | -6319 to 3846      | No           | ns      | >0.9999          |
| RBD AZ+M vs. P+M                  | -2638      | -11787 to 6511     | No           | ns      | 0.9997           |
| RBD P+P vs. P+M                   | -1401      | -9906 to 7104      | No           | ns      | >0.9999          |
| NTD AZ+P vs. AZ+M                 | 3368       | -2149 to 8885      | No           | ns      | 0.7418           |
| NTD AZ+P vs. P+P                  | 4098       | -269.4 to 8465     | No           | ns      | 0.0919           |
| NTD AZ+P vs. P+M                  | 3739       | -5033 to 12510     | No           | ns      | 0.9822           |
| NTD AZ+M vs. P+P                  | 729.8      | -4353 to 5813      | No           | ns      | >0.9999          |
| NTD AZ+M vs. P+M                  | 370.8      | -8778 to 9520      | No           | ns      | >0.9999          |
| NTD P+P vs. P+M                   | -359       | -8864 to 8146      | No           | ns      | >0.9999          |
| N AZ+P vs. AZ+M                   | 2.755      | -5514 to 5520      | No           | ns      | >0.9999          |
| N AZ+P vs. P+P                    | -0.7066    | -4368 to 4366      | No           | ns      | >0.9999          |
| N AZ+P vs. P+M                    | -3.095     | -8775 to 8768      | No           | ns      | >0.9999          |
| N AZ+M vs. P+P                    | -3.461     | -5086 to 5079      | No           | ns      | >0.9999          |
| N AZ+M vs. P+M                    | -5.85      | -9155 to 9143      | No           | ns      | >0.9999          |
| N P+P vs. P+M                     | -2.389     | -8508 to 8503      | No           | ns      | >0.9999          |

P = BNT162b2; AZ = ChAdOx1; M = mRNA-1273

**Supplementary Table 6. Comparison of HCoV antibody responses elicited by a third dose of SARS-CoV-2 vaccine.** Data were analyzed in GraphPad Prism v8.4.3, groups were compared by ordinary one-way ANOVA. P= BNT162b2, AZ = ChAdOx1, M = mRNA-1273.

| Tukey's multiple comparisons test | Mean Diff. | 95.00% CI of diff. | Significant? | Summary | Adjusted P Value |
|-----------------------------------|------------|--------------------|--------------|---------|------------------|
| 229E AZ+P vs. AZ+M                | -11229     | -47020 to 24562    | No           | ns      | 0.9993           |
| 229E AZ+P vs. P+P                 | -5670      | -34000 to 22661    | No           | ns      | >0.9999          |
| 229E AZ+P vs. P+M                 | 4487       | -52417 to 61391    | No           | ns      | >0.9999          |
| 229E AZ+M vs. P+P                 | 5560       | -27414 to 38533    | No           | ns      | >0.9999          |
| 229E AZ+M vs. P+M                 | 15716      | -43637 to 75069    | No           | ns      | >0.9999          |
| 229E P+P vs. P+M                  | 10156      | -45019 to 65332    | No           | ns      | >0.9999          |
| OC43 AZ+P vs. AZ+M                | -29568     | -65359 to 6224     | No           | ns      | 0.2369           |
| OC43 AZ+P vs. P+P                 | -121       | -28451 to 28209    | No           | ns      | >0.9999          |
| OC43 AZ+P vs. P+M                 | -5301      | -62205 to 51603    | No           | ns      | >0.9999          |
| OC43 AZ+M vs. P+P                 | 29447      | -3527 to 62420     | No           | ns      | 0.1382           |
| OC43 AZ+M vs. P+M                 | 24266      | -35086 to 83619    | No           | ns      | 0.988            |
| OC43 P+P vs. P+M                  | -5180      | -60356 to 49996    | No           | ns      | >0.9999          |
| NL63 AZ+P vs. AZ+M                | -11140     | -46931 to 24651    | No           | ns      | 0.9994           |
| NL63 AZ+P vs. P+P                 | -8074      | -36404 to 20256    | No           | ns      | 0.9998           |
| NL63 AZ+P vs. P+M                 | -16842     | -73746 to 40062    | No           | ns      | 0.9996           |
| NL63 AZ+M vs. P+P                 | 3066       | -29908 to 36040    | No           | ns      | >0.9999          |
| NL63 AZ+M vs. P+M                 | -5702      | -65055 to 53651    | No           | ns      | >0.9999          |
| NL63 P+P vs. P+M                  | -8768      | -63944 to 46407    | No           | ns      | >0.9999          |
| HKU1 AZ+P vs. AZ+M                | 9482       | -26309 to 45273    | No           | ns      | >0.9999          |
| HKU1 AZ+P vs. P+P                 | 8028       | -20303 to 36358    | No           | ns      | 0.9998           |
| HKU1 AZ+P vs. P+M                 | 8678       | -48226 to 65582    | No           | ns      | >0.9999          |
| HKU1 AZ+M vs. P+P                 | -1454      | -34428 to 31519    | No           | ns      | >0.9999          |
| HKU1 AZ+M vs. P+M                 | -804.1     | -60157 to 58549    | No           | ns      | >0.9999          |
| HKU1 P+P vs. P+M                  | 650.4      | -54525 to 55826    | No           | ns      | >0.9999          |

P = BNT162b2; AZ = ChAdOx1; M = mRNA-1273



**Supplementary Table 7. Comparison of influenza antibody responses elicited by a third dose of SARS-CoV-2 vaccine.** Data were analyzed in GraphPad Prism v8.4.3, groups were compared by ordinary one-way ANOVA. P = BNT162b2, AZ = ChAdOx1, M = mRNA-1273.

| Tukey's multiple comparisons test | Mean Diff. | 95.00% CI of diff. | Significant? | Summary | Adjusted P Value |
|-----------------------------------|------------|--------------------|--------------|---------|------------------|
| Flu A Michigan H1 AZ+P vs. AZ+M   | 410671     | 6882 to 814460     | Yes          | *       | 0.0413           |
| Flu A Michigan H1 AZ+P vs. P+P    | 279008     | -40609 to 598625   | No           | ns      | 0.1757           |
| Flu A Michigan H1 AZ+P vs. P+M    | 459436     | -182547 to 1101420 | No           | ns      | 0.5271           |
| Flu A Michigan H1 AZ+M vs. P+P    | -131663    | -503667 to 240341  | No           | ns      | 0.9993           |
| Flu A Michigan H1 AZ+M vs. P+M    | 48766      | -620842 to 718373  | No           | ns      | >0.9999          |
| Flu A Michigan H1 P+P vs. P+M     | 180429     | -442054 to 802911  | No           | ns      | >0.9999          |
| Flu A Hong Kong H3 AZ+P vs. AZ+M  | -64025     | -467814 to 339763  | No           | ns      | >0.9999          |
| Flu A Hong Kong H3 AZ+P vs. P+P   | -32804     | -352421 to 286812  | No           | ns      | >0.9999          |
| Flu A Hong Kong H3 AZ+P vs. P+M   | 56571      | -585413 to 698554  | No           | ns      | >0.9999          |
| Flu A Hong Kong H3 AZ+M vs. P+P   | 31221      | -340783 to 403225  | No           | ns      | >0.9999          |
| Flu A Hong Kong H3 AZ+M vs. P+M   | 120596     | -549012 to 790204  | No           | ns      | >0.9999          |
| Flu A Hong Kong H3 P+P vs. P+M    | 89375      | -533107 to 711857  | No           | ns      | >0.9999          |
| Flu A Shanghai H7 AZ+P vs. AZ+M   | 6841       | -396948 to 410630  | No           | ns      | >0.9999          |
| Flu A Shanghai H7 AZ+P vs. P+P    | 469.8      | -319147 to 320087  | No           | ns      | >0.9999          |
| Flu A Shanghai H7 AZ+P vs. P+M    | 9363       | -632620 to 651346  | No           | ns      | >0.9999          |
| Flu A Shanghai H7 AZ+M vs. P+P    | -6371      | -378375 to 365633  | No           | ns      | >0.9999          |
| Flu A Shanghai H7 AZ+M vs. P+M    | 2522       | -667086 to 672130  | No           | ns      | >0.9999          |
| Flu A Shanghai H7 P+P vs. P+M     | 8893       | -613589 to 631376  | No           | ns      | >0.9999          |
| Flu B Phuket HA AZ+P vs. AZ+M     | -101482    | -505271 to 302307  | No           | ns      | >0.9999          |
| Flu B Phuket HA AZ+P vs. P+P      | -6309      | -325926 to 313308  | No           | ns      | >0.9999          |
| Flu B Phuket HA AZ+P vs. P+M      | 65660      | -576323 to 707643  | No           | ns      | >0.9999          |
| Flu B Phuket HA AZ+M vs. P+P      | 95173      | -276831 to 467178  | No           | ns      | >0.9999          |
| Flu B Phuket HA AZ+M vs. P+M      | 167142     | -502466 to 836750  | No           | ns      | >0.9999          |
| Flu B Phuket HA P+P vs. P+M       | 71969      | -550513 to 694451  | No           | ns      | >0.9999          |
| Flu B Brisbane AZ+P vs. AZ+M      | -2954      | -406743 to 400834  | No           | ns      | >0.9999          |
| Flu B Brisbane AZ+P vs. P+P       | 24661      | -294956 to 344278  | No           | ns      | >0.9999          |
| Flu B Brisbane AZ+P vs. P+M       | 122461     | -519522 to 764444  | No           | ns      | >0.9999          |
| Flu B Brisbane AZ+M vs. P+P       | 27615      | -344389 to 399620  | No           | ns      | >0.9999          |
| Flu B Brisbane AZ+M vs. P+M       | 125415     | -544193 to 795023  | No           | ns      | >0.9999          |
| Flu B Brisbane P+P vs. P+M        | 97800      | -524683 to 720282  | No           | ns      | >0.9999          |

P = BNT162b2; AZ = ChAdOx1; M = mRNA-1273

**Supplementary Table 8. Effect of third dose of SARS-CoV-2 vaccine on neutralising antibody titres. Neutralising antibody responses were quantified against Wuhan or Omicron spike glycoprotein-bearing HIV (SARS-CoV-2) pseudotypes. Data were analyzed in GraphPad Prism v8.4.3, groups were compared by ordinary one-way ANOVA.**

| <b>BNT162b2 prime (doses 1 &amp; 2)</b>     |                   |                           |                     |                    |                         |  |
|---------------------------------------------|-------------------|---------------------------|---------------------|--------------------|-------------------------|--|
| <b>Tukey's multiple comparisons test</b>    | <b>Mean Diff.</b> | <b>95.00% CI of diff.</b> | <b>Significant?</b> | <b>Summary</b>     | <b>Adjusted P Value</b> |  |
| B.1 (dose 2) vs. (dose 3)                   | -1186             | -4381 to 2010             | No                  | ns                 | 0.7655                  |  |
| BA.1 (dose 2) vs. (dose 3)                  | 56.56             | -3139 to 3252             | No                  | ns                 | >0.9999                 |  |
| <b>Test details</b>                         | <b>Mean 1</b>     | <b>Mean 2</b>             | <b>Mean Diff.</b>   | <b>SE of diff.</b> | <b>n1</b>               |  |
| B.1 (dose 2) vs. (dose 3)                   | 4978              | 6164                      | -1186               | 1219               | 24                      |  |
| BA.1 (dose 2) vs. (dose 3)                  | 148.3             | 91.73                     | 56.56               | 1219               | 24                      |  |
| <b>ChAdOx1 prime (doses 1 &amp; 2)</b>      |                   |                           |                     |                    |                         |  |
| <b>Tukey's multiple comparisons test</b>    | <b>Mean Diff.</b> | <b>95.00% CI of diff.</b> | <b>Significant?</b> | <b>Summary</b>     | <b>Adjusted P Value</b> |  |
| B.1 (dose 2) vs. (dose 3)                   | -7360             | -11073 to -3647           | <b>Yes</b>          | <b>****</b>        | <b>&lt;0.0001</b>       |  |
| BA.1 (dose 2) vs. (dose 3)                  | -203.7            | -3916 to 3509             | No                  | ns                 | 0.9989                  |  |
| <b>Test details</b>                         | <b>Mean 1</b>     | <b>Mean 2</b>             | <b>Mean Diff.</b>   | <b>SE of diff.</b> | <b>n1</b>               |  |
| B.1 (dose 2) vs. (dose 3)                   | 882.3             | 8242                      | -7360               | 1416               | 24                      |  |
| BA.1 (dose 2) vs. (dose 3)                  | 61.9              | 265.5                     | -203.7              | 1416               | 24                      |  |
| <b>Dose 3 titre comparison</b>              |                   |                           |                     |                    |                         |  |
| <b>Tukey's multiple comparisons test</b>    | <b>Mean Diff.</b> | <b>95.00% CI of diff.</b> | <b>Significant?</b> | <b>Summary</b>     | <b>Adjusted P Value</b> |  |
| B.1 (BNT162b2 dose 2) vs. (ChAdOX1 dose 2)  | -2079             | -7008 to 2851             | No                  | ns                 | 0.6859                  |  |
| BA.1 (BNT162b2 dose 2) vs. (ChAdOX1 dose 2) | -173.8            | -5103 to 4756             | No                  | ns                 | 0.9997                  |  |
| <b>Test details</b>                         | <b>Mean 1</b>     | <b>Mean 2</b>             | <b>Mean Diff.</b>   | <b>SE of diff.</b> | <b>n1</b>               |  |
| B.1 (BNT162b2 dose 2) vs. (ChAdOX1 dose 2)  | 6164              | 8242                      | -2079               | 1877               | 20                      |  |
| BA.1 (BNT162b2 dose 2) vs. (ChAdOX1 dose 2) | 91.73             | 265.5                     | -173.8              | 1877               | 20                      |  |

**Supplementary Table 9: Demographics, SARS-CoV-2 positivity status and vaccination status for the study population.** Population consisted of 116,089 people aged 18 and over, registered as living in NHS Greater Glasgow and Clyde and tested by PCR test for SARS-CoV-2 infection between 6th and 26th December 2021, split by SARS-CoV-2 variant status.

|                                                                      | <i>Negative</i> | <i>Delta</i>  | <i>Omicron</i> |
|----------------------------------------------------------------------|-----------------|---------------|----------------|
| <b>Demographics</b>                                                  |                 |               |                |
| <b>Age on 31<sup>st</sup> October 2021</b>                           |                 |               |                |
| <i>Minimum</i>                                                       | 18.77           | 18.85         | 18.77          |
| <i>1st Quartile</i>                                                  | 31.66           | 32.89         | 26.59          |
| <i>Median</i>                                                        | 44.32           | 41.99         | 35.41          |
| <i>Mean</i>                                                          | 46.53           | 42.89         | 38.77          |
| <i>3rd Quartile</i>                                                  | 58.55           | 52.05         | 49.39          |
| <i>Maximum</i>                                                       | 108.56          | 100.16        | 102.82         |
| <b>Sex</b>                                                           |                 |               |                |
| <i>Female</i>                                                        | 55611 (56.74%)  | 3022 (3.08%)  | 9298 (8.43%)   |
| <i>Male</i>                                                          | 36570 (37.31%)  | 2806 (2.86%)  | 8782 (7.96%)   |
| <b>SIMD (2016) vigintile</b>                                         |                 |               |                |
| <i>Minimum</i>                                                       | 1.00            | 1.00          | 1.00           |
| <i>1st Quartile</i>                                                  | 3.00            | 3.00          | 4.00           |
| <i>Median</i>                                                        | 9.00            | 9.00          | 9.00           |
| <i>Mean</i>                                                          | 9.39            | 9.38          | 9.81           |
| <i>3rd Quartile</i>                                                  | 16.00           | 16.00         | 16.00          |
| <i>Maximum</i>                                                       | 20.00           | 20.00         | 20.00          |
| <i>Missing values</i>                                                | 1748            | 119           | 341            |
| <b>SARS-CoV-2 positivity status</b>                                  |                 |               |                |
| <b>Previous confirmed SARS-CoV-2 infection status</b>                |                 |               |                |
| <i>No previous infection</i>                                         | 79050 (80.66%)  | 5745 (5.86%)  | 16396 (14.87%) |
| <i>Had previous infection</i>                                        | 13131 (13.40%)  | 83 (0.08%)    | 1684 (1.53%)   |
| <b>Vaccination status</b>                                            |                 |               |                |
| <b>Vaccination schedule</b>                                          |                 |               |                |
| <i>Unvaccinated</i>                                                  | 695 (0.80%)     | 58 (1.18%)    | 140 (0.84%)    |
| <i>1 dose only</i>                                                   | 2514 (2.89%)    | 243 (4.93%)   | 574 (3.46%)    |
| <i>2 doses ChAdOx1</i>                                               | 21171 (24.33%)  | 2066 (41.92%) | 4489 (27.08%)  |
| <i>2 doses BNT162b2</i>                                              | 27050 (31.09%)  | 1771 (35.94%) | 6926 (41.79%)  |
| <i>2 doses mRNA-1273</i>                                             | 7035 (8.09%)    | 371 (7.53%)   | 2174 (13.12%)  |
| <i>3rd dose BNT162b2</i>                                             | 21381 (24.57%)  | 319 (6.47%)   | 1624 (9.80%)   |
| <i>3rd dose mRNA-1273</i>                                            | 7158 (8.23%)    | 100 (2.03%)   | 648 (3.91%)    |
| <b>Time (days) since most recent dose by variant and dose number</b> |                 |               |                |

|                     | <i>Negative</i> |          |          | <i>Delta</i> |          |          | <i>Omicron</i> |          |          |
|---------------------|-----------------|----------|----------|--------------|----------|----------|----------------|----------|----------|
|                     | <i>1</i>        | <i>2</i> | <i>3</i> | <i>1</i>     | <i>2</i> | <i>3</i> | <i>1</i>       | <i>2</i> | <i>3</i> |
| <i>Minimum</i>      | 14.00           | 14.00    | 14.00    | 15.00        | 17.00    | 14.00    | 14.00          | 14.00    | 14.00    |
| <i>1st Quartile</i> | 87.00           | 119.00   | 30.00    | 111.00       | 129.00   | 29.75    | 90.00          | 113.00   | 26.00    |
| <i>Median</i>       | 152.00          | 154.00   | 45.00    | 158.00       | 157.00   | 45.00    | 151.00         | 139.00   | 42.00    |
| <i>Mean</i>         | 150.13          | 156.67   | 44.41    | 159.80       | 158.98   | 46.03    | 142.68         | 146.19   | 42.44    |
| <i>3rd Quartile</i> | 192.00          | 189.00   | 60.00    | 200.50       | 184.00   | 62.00    | 180.75         | 172.00   | 59.00    |
| <i>Maximum</i>      | 361.00          | 462.00   | 285.00   | 329.00       | 324.00   | 236.00   | 331.00         | 460.00   | 128.00   |
