# Supplementary material for: SARS-CoV-2 Omicron is an immune escape variant with an altered cell entry pathway
Source: PubMed Central journal article supplement (PMC9352574; doi:10.1038/s41564-022-01143-7), 2022-07-07
Supplement: 41564_2022_1143_MOESM16_ESM.pdf [file 41564_2022_1143_MOESM16_ESM.pdf]

Raw blots images used in Fig.

51

4-12% Bis-Tris gels run in MOPS running buffer

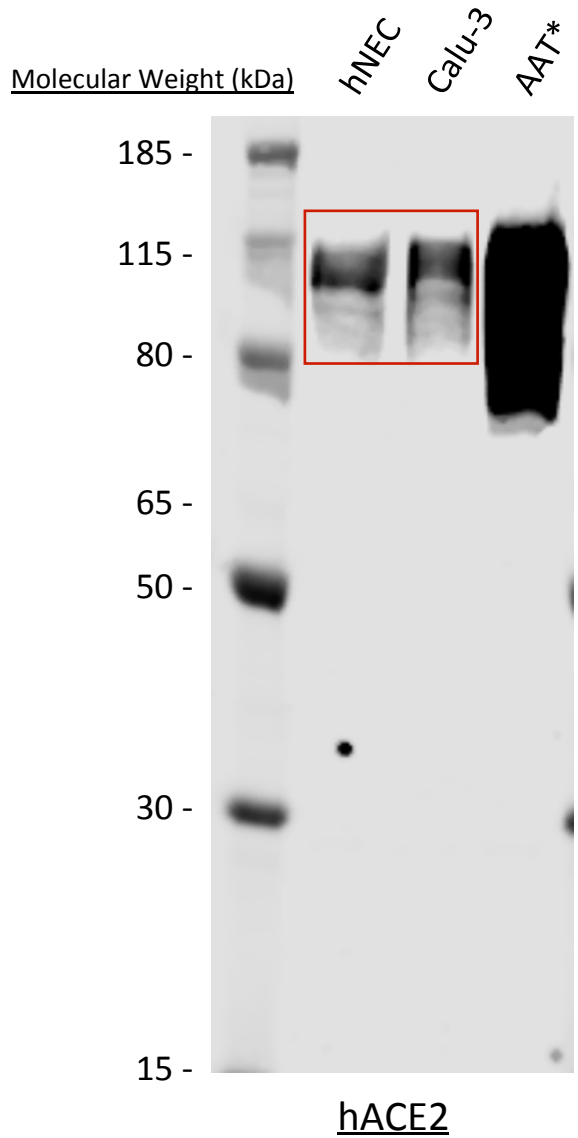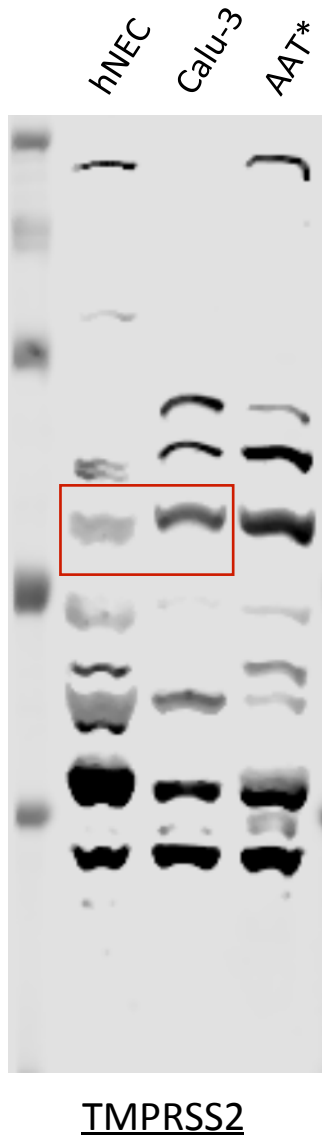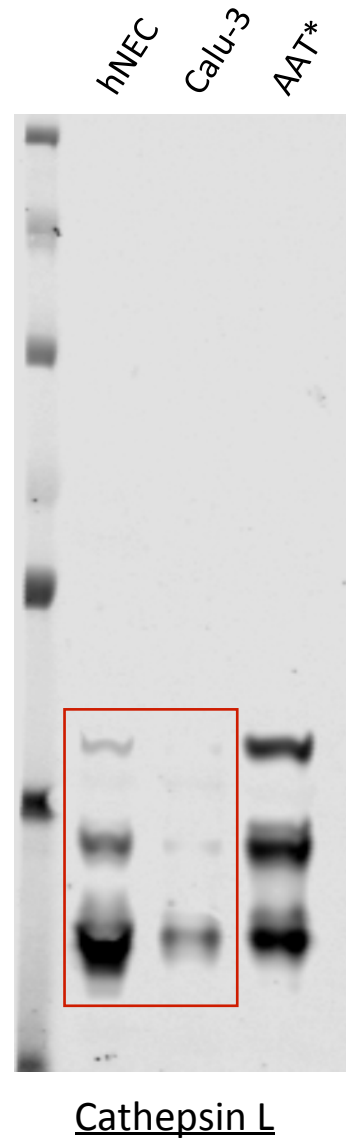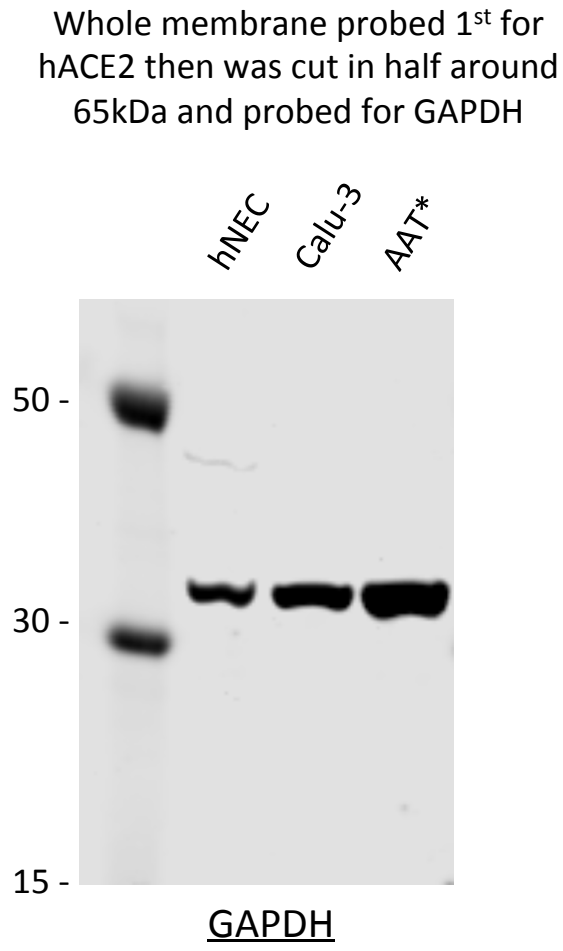

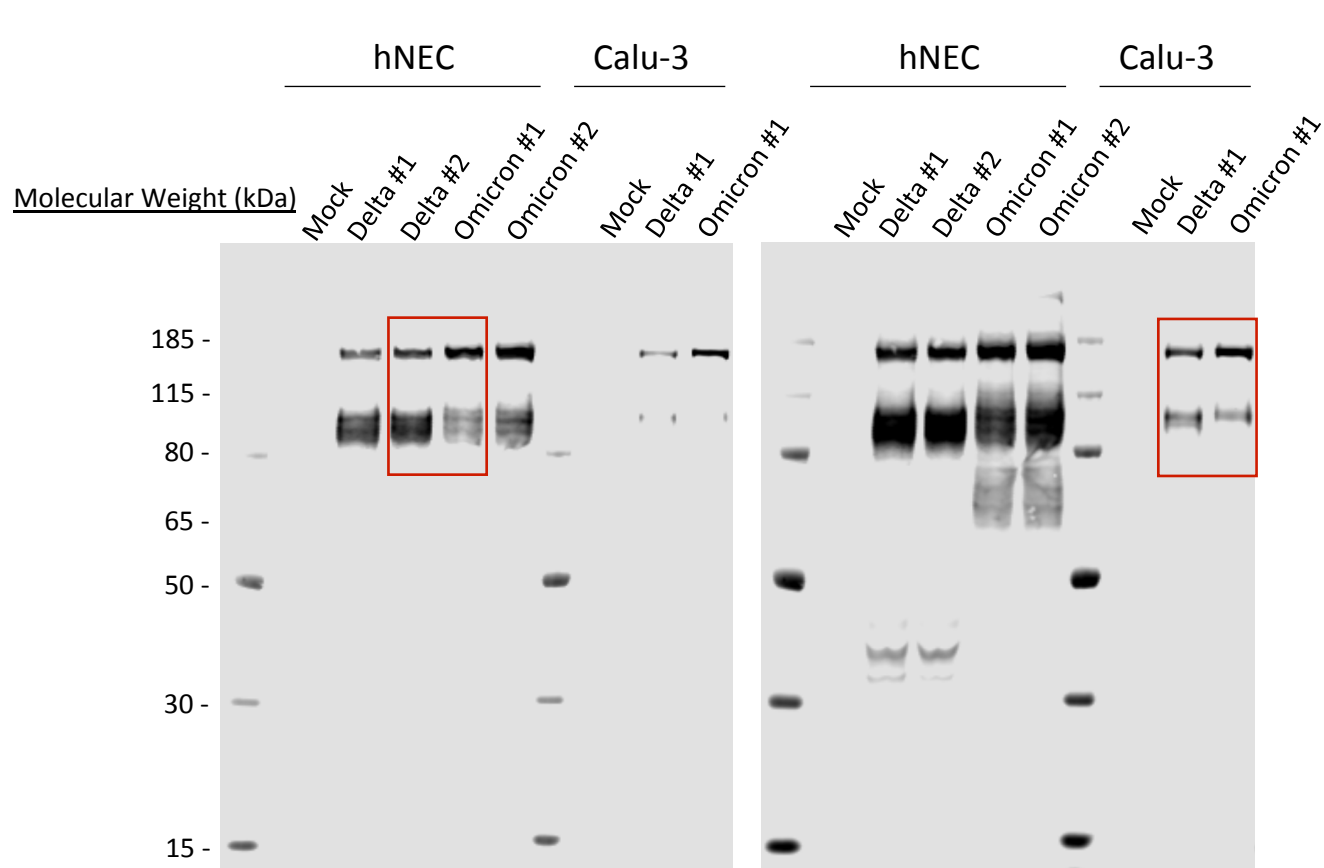

Settings adjusted for clearer signal from Calu-3 cell lysates

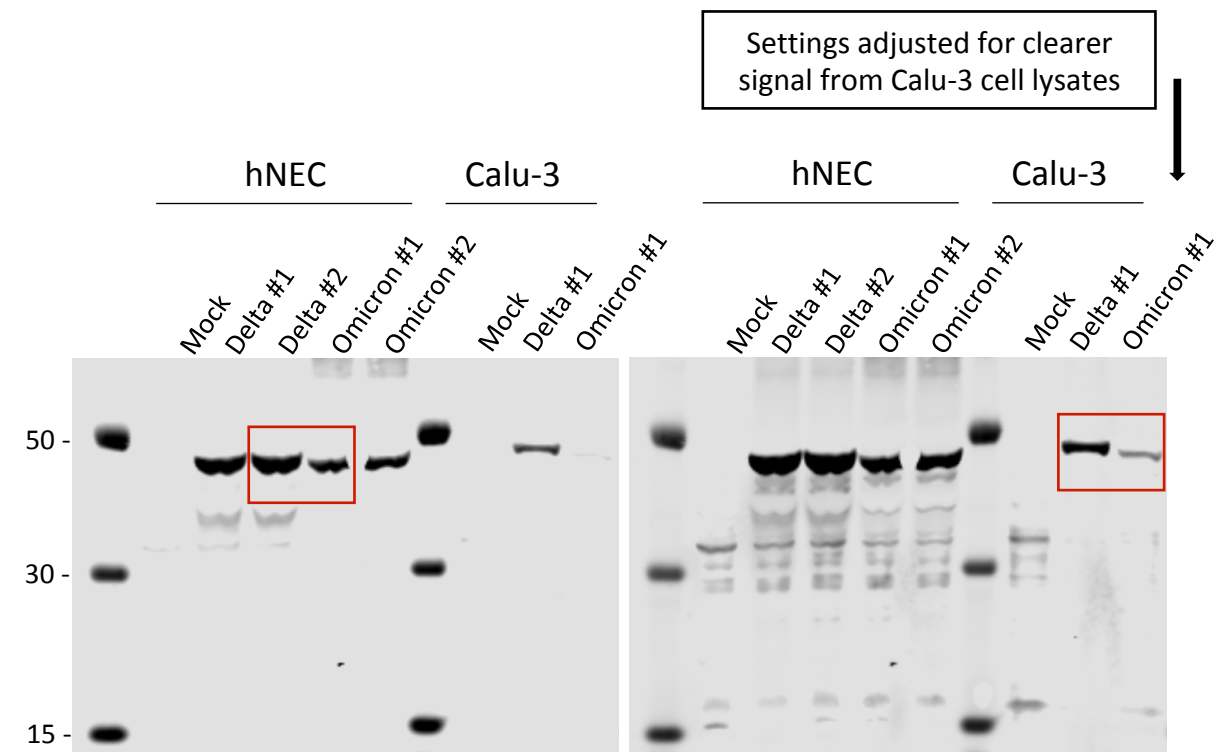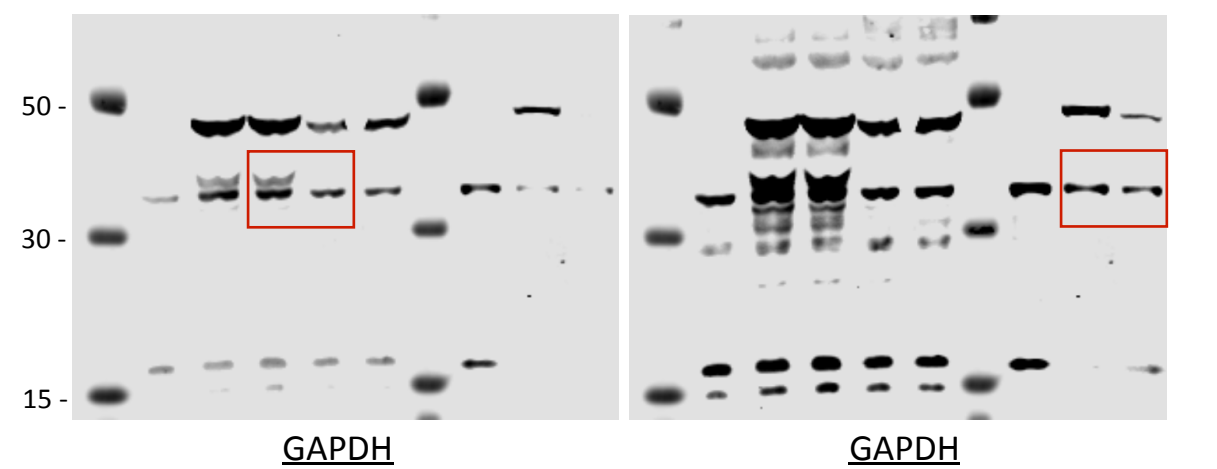

Whole membrane probed 1<sup>st</sup> for Spike then was cut in half around 65kDa and probed for N followed by GAPDH
