# Supplementary material for: SARS-CoV-2 Omicron is an immune escape variant with an altered cell entry pathway
Source: PubMed Central journal article supplement (PMC9352574; doi:10.1038/s41564-022-01143-7), 2022-07-07

Fig. 6 d

S1

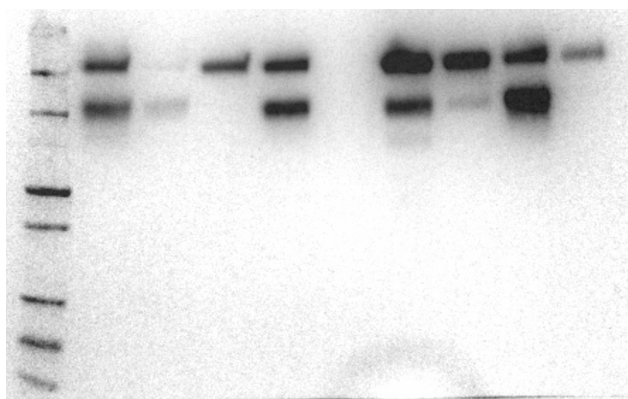

S2

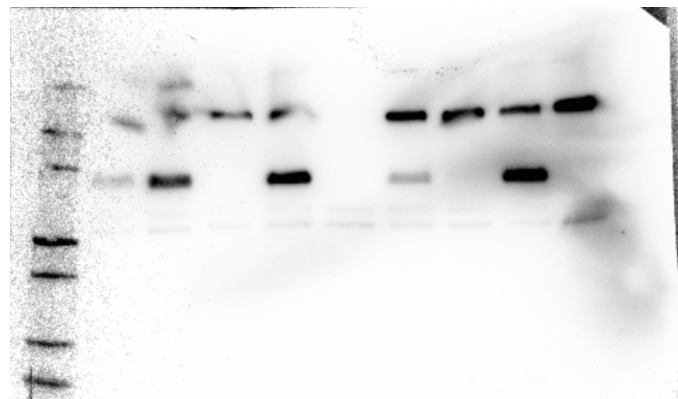

p55

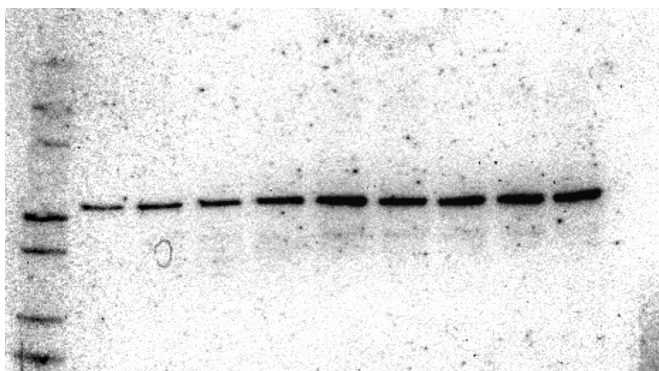

Actin

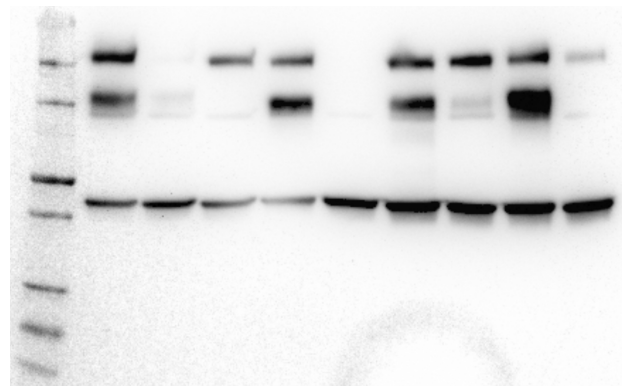

Supplement: 41564_2022_1143_MOESM17_ESM.pdf [file 41564_2022_1143_MOESM17_ESM.pdf]
